# Supplementary material
Source: PubMed Central journal article supplement (PMC7250779)
Supplement: mmc1.pdf [file mmc1.pdf]

## Supplemental Information

### **SARS-CoV-2 Reverse Genetics Reveals a Variable**

### **Infection Gradient in the Respiratory Tract**

**Yixuan J. Hou, Kenichi Okuda, Caitlin E. Edwards, David R. Martinez, Takanori Asakura, Kenneth H. Dinnon III, Takafumi Kato, Rhianna E. Lee, Boyd L. Yount, Teresa M. Mascenik, Gang Chen, Kenneth N. Olivier, Andrew Ghio, Longping V. Tse, Sarah R. Leist, Lisa E. Gralinski, Alexandra Schäfer, Hong Dang, Rodney Gilmore, Satoko Nakano, Ling Sun, M. Leslie Fulcher, Alessandra Livraghi-Butrico, Nathan I. Nicely, Mark Cameron, Cheryl Cameron, David J. Kelvin, Aravinda de Silva, David M. Margolis, Alena Markmann, Luther Bartelt, Ross Zumwalt, Fernando J. Martinez, Steven P. Salvatore, Alain Borczuk, Purushothama R. Tata, Vishwaraj Sontake, Adam Kimple, Ilona Jaspers, Wanda K. O'Neal, Scott H. Randell, Richard C. Boucher, and Ralph S. Baric**

Table S1. Demographics of normal subjects studied and experimental use, Related to the STAR Methods

| #  | Age | Sex | Smoking History        | Airway region | Collection                       | Related figure   |
|----|-----|-----|------------------------|---------------|----------------------------------|------------------|
| 1  | 40  | M   | NS                     | Bronchi       | Bronchial brushing               | Fig. 4E-I        |
| 2  | 22  | M   | NS                     | Bronchi       | Bronchial brushing               | Fig. 4E-I        |
| 3  | 25  | M   | NS                     | Bronchi       | Bronchial brushing               | Fig. 4E-I        |
| 4  | 48  | M   | Unknown                | Nose          | Excess surgical tissue           | Fig. 4A          |
| 5  | 58  | M   | Unknown                | Nose          | Excess surgical tissue           | Fig. 4A          |
| 6  | 57  | M   | Unknown                | Nose          | Excess surgical tissue           | Fig. 4E-I        |
| 7  | 41  | F   | Unknown                | Nose          | Excess surgical tissue           | Fig. 4E-I        |
| 8  | 73  | F   | Unknown                | Nose          | Excess surgical tissue           | Fig. 4E-I        |
| 9  | 15  | M   | NS                     | Lung          | Transplant donor lung            | Fig. 4Evi, 4Evii |
| 10 | 25  | M   | NS                     | Lung          | Transplant donor lung            | Fig. 4Evi, 4Evii |
| 11 | 19  | M   | NS                     | Lung          | Transplant donor lung            | Fig. 4Evi, 4Evii |
| 12 | 17  | F   | NS                     | Lung          | Transplant donor lung            | Fig. 4A, 5A      |
| 13 | 52  | F   | NS                     | Lung          | Transplant donor lung            | Fig. 4A, 5A      |
| 14 | 37  | M   | NS                     | Lung          | Transplant donor lung            | Fig. 4A, 5A      |
| 15 | 44  | M   | NS                     | Lung          | Transplant donor lung            | Fig. 4A, 5A      |
| 16 | 55  | F   | NS                     | Lung          | Transplant donor lung            | Fig. 4A, 4C, 5A  |
| 17 | 27  | M   | NS                     | Lung          | Transplant donor lung            | Fig. 4A, 5A      |
| 18 | 35  | F   | 5 cigarettes/<br>month | Nose/ Bronchi | Nasal scrape/ Bronchial brushing | Fig. 4B          |
| 19 | 22  | M   | NS                     | Nose/ Bronchi | Nasal scrape/ Bronchial brushing | Fig. 4B          |
| 20 | 39  | F   | NS                     | Nose/ Bronchi | Nasal scrape/ Bronchial brushing | Fig. 4B          |
| 21 | 35  | M   | 5 PY                   | Nose/ Bronchi | Nasal scrape/ Bronchial brushing | Fig. 4B          |
| 22 | 23  | M   | NS                     | Nose/ Bronchi | Nasal scrape/ Bronchial brushing | Fig. 4B          |
| 23 | 22  | F   | NS                     | Nose/ Bronchi | Nasal scrape/ Bronchial brushing | Fig. 4B          |
| 24 | 22  | F   | NS                     | Nose/ Bronchi | Nasal scrape/ Bronchial brushing | Fig. 4B          |
| 25 | 42  | M   | NS                     | Nose/ Bronchi | Nasal scrape/ Bronchial brushing | Fig. 4B          |
| 26 | 35  | F   | NS                     | Lung          | Transplant donor lung            | Fig. 4C          |
| 27 | 53  | F   | NS                     | Lung          | Transplant donor lung            | Fig. 4C          |
| 28 | 24  | M   | NS                     | Lung          | Transplant donor lung            | Fig. 4C          |
| 29 | 25  | M   | NS                     | Lung          | Transplant donor lung            | Fig. 4C          |
| 30 | 15  | M   | NS                     | Lung          | Transplant donor lung            | Fig. 4C          |
| 31 | 27  | M   | NS                     | Lung          | Transplant donor lung            | Fig. 4C          |
| 32 | 39  | F   | Unknown                | Tonsil        | Excess surgical tissue           | Fig. S3          |
| 33 | 37  | F   | Unknown                | Tonsil        | Excess surgical tissue           | Fig. S3          |
| 34 | 38  | F   | Unknown                | Tonsil        | Excess surgical tissue           | Fig. S3          |

NS = never smoker, PY = pack-year

Table S2. Demographics of CF subjects studied for RNA-ISH experiment, Related to the STAR Methods

| # | Age | Sex | CFTR mutation | Airway region | Collection           | Related figure |
|---|-----|-----|---------------|---------------|----------------------|----------------|
| 1 | 45  | F   | DF508/N1303K  | Lung          | Lung transplantation | Fig. 5A        |
| 2 | 42  | F   | DF508/DF508   | Lung          | Lung transplantation | Fig. 5A        |
| 3 | 30  | F   | DF508/DF508   | Lung          | Lung transplantation | Fig. 5A        |
| 4 | 15  | M   | DF508/W1282X  | Lung          | Lung transplantation | Fig. 5A        |
| 5 | 34  | M   | DF508/W1282X  | Lung          | Lung transplantation | Fig. 5A        |
| 6 | 59  | F   | DF508/N1303K  | Lung          | Lung transplantation | Fig. 5A        |
